# Supplementary material for: Nuclear membrane-localised NOX4D generates pro-survival ROS in FLT3-ITD-expressing AML
Source: PubMed Central journal article supplement (PMC5739649; doi:10.18632/oncotarget.22241), 2017-11-01
Supplement: oncotarget-08-105440-s001.pdf [file oncotarget-08-105440-s001.pdf]

## Nuclear membrane-localised NOX4D generates pro-survival ROS in FLT3-ITD-expressing AML

### SUPPLEMENTARY MATERIALS

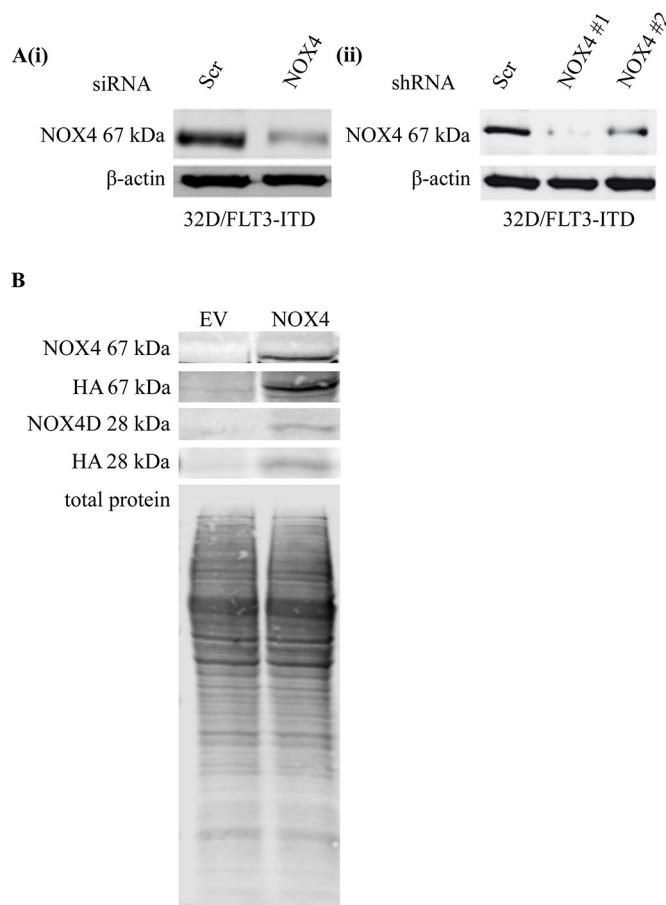

**Supplementary Figure 1: NOX4 antibody specificity.** Abcam NOX4 antibody (Ab109225) specificity. Western blot analysis of NOX4 67 kDa protein levels in 32D/FLT3-ITD whole cell lysates at 48 h following NOX4 siRNA and shRNA transfection (**A**).  $\beta$ -actin was used as a loading control. Novus Biologicals NOX4 antibody (NB110-58849) specificity. HEK293-T cells were transfected with EV-HA or pCMV3-C-HA encoding NOX4 using Calcium Phosphate. Western blot analysis of NOX4 67 kDa and NOX4D 28 kDa protein expression in HEK 293-T whole cell lysates following transfection with EV-HA or NOX4-HA for 48 h (**B**). Total protein was used as a loading control. Blots are representative of three independent experiments.
